# Supplementary material for: Fasting potentiates the anticancer activity of tyrosine kinase inhibitors by strengthening MAPK signaling inhibition
Source: PubMed Central journal article supplement (PMC4494907; doi:10.18632/oncotarget.3689), 2015-03-18
Supplement: oncotarget-06-11820-s001.pdf [file oncotarget-06-11820-s001.pdf]

# Fasting potentiates the anticancer activity of tyrosine kinase inhibitors by strengthening MAPK signaling inhibition

## Supplementary Material

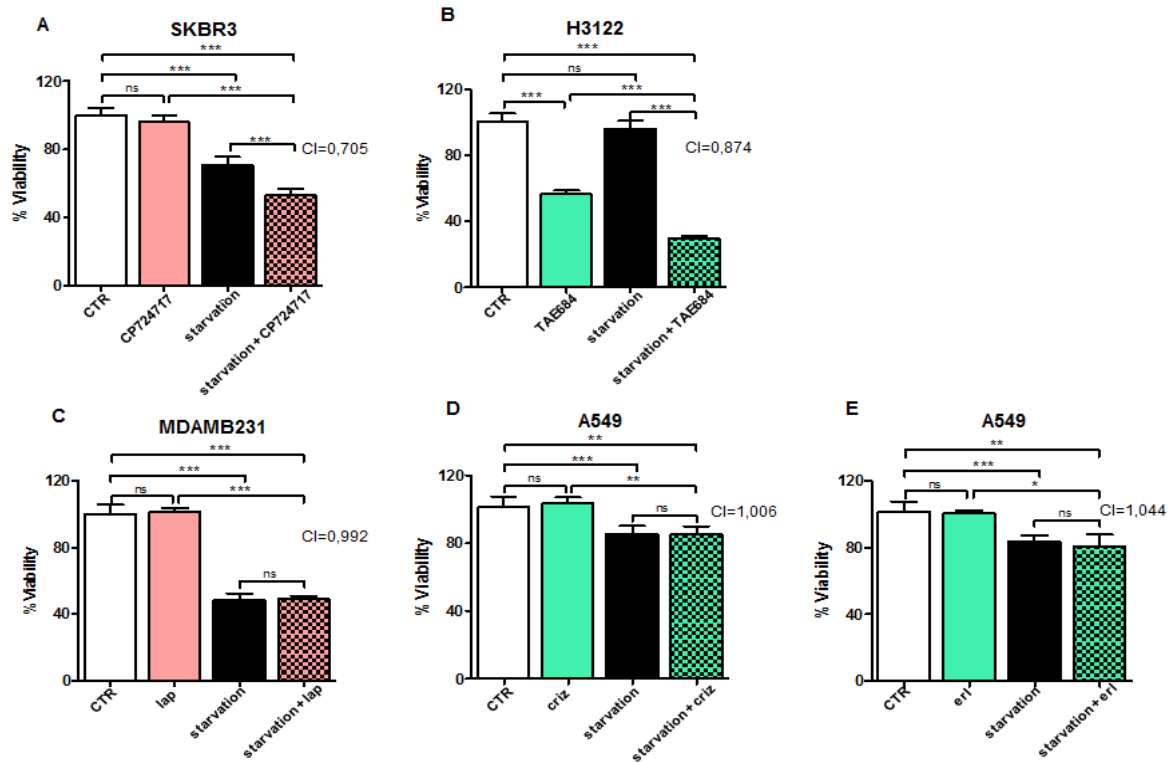

**Supplementary Figure 1: Starvation conditions synergistically increase the antiproliferative effects of TKIs in cultured cancer cells without affecting the specificity of these agents.** A-E, SKBR3, H3122, MDA-MB-231 (triple-negative, mesenchymal-like breast cancer), and A549 (NSCLC, WT EGFR) cells were plated in 96 well plates in regular culture medium. 24 h later, the cell medium was removed and cells were incubated either in regular medium (CTR) or in starvation medium (starvation). 24 h later, 100 nM of the HER2 TKI CP724717 (SKBR3, A), 100 nM of the ALK TKI TAE784 (H3122, B), 100 nM lapatinib (MDA-MB-231, C), 400 nM crizotinib (criz, A549, D), or 100 nM erlotinib (erl, A549, E) were added where indicated. 72 h later, viability was detected by CellTiter96 Aqueous1. CIs for the combination TKI-starvation are indicated within each panel.

**Supplementary Table 1:** DEGs among different conditions in H3122 cell treated with starvation, crizotinib, or their combination

| # | Condition                         | p-value<0.001 | Up   | Down |
|---|-----------------------------------|---------------|------|------|
| 1 | STARVATION vs. CTR                | 2308          | 1133 | 1175 |
| 2 | CRIZ vs. CTR                      | 1305          | 666  | 639  |
| 3 | STARVATION vs. CRIZ               | 568           | 32   | 536  |
| 4 | CRIZ+STARVATION vs. CTR           | 2676          | 1492 | 1184 |
| 5 | CRIZ+STARVATION vs.<br>STARVATION | 334           | 192  | 142  |
| 6 | CRIZ+STARVATION vs. CRIZ          | 264           | 82   | 182  |

**Supplementary Table 2:** Functional categorization of genes downregulated during crizotinib treatment

**Supplementary Table 3:** Common Genes in the first top four GO Categories of cells treated with starvation or with crizotinib

**Supplementary Table 4:** Functional Categorization of DEGs of cells treated with starvation plus crizotinib vs. crizotinib alone

**Supplementary Table 5:** IPA of gene expression profiles in H3122 cells treated with crizotinib plus starvation vs. crizotinib alone
